# Supplementary material for: Comprehensive assessment of free nitrous acid-based technology to establish partial nitrification
Source: Royal Society of Chemistry journal article supplement (doi:10.1039/c8ew00637g), 2018-01-01
Supplement: c8ew00637g1.pdf [file c8ew00637g1.pdf]

## Supplementary Material

for

### Comprehensive assessment of free nitrous acid based technology to establish partial nitrification

Cancan Jiang<sup>1,2</sup>, Shengjun Xu<sup>1</sup>, Rui Wang<sup>1,2</sup>, Sining Zhou<sup>1,2</sup>, Shanghua Wu<sup>1,2</sup>, Xiangui Zeng<sup>3</sup>,  
Zhihui Bai<sup>1</sup>, Guoqiang Zhuang<sup>1</sup>, Xuliang Zhuang<sup>1,\*</sup>

<sup>1</sup>Research Center for Eco-Environmental Sciences, Chinese Academy of Sciences, Beijing 100085, China. <sup>2</sup>College of Resources and Environment, University of Chinese Academy of Sciences, Beijing 100049, China. <sup>3</sup>Shenzhen Di Da Water Engineering Limited Company

\*Correspondence and requests for materials should be addressed to X.Z. (Email:

[xlzhuang@rcees.ac.cn](mailto:xlzhuang@rcees.ac.cn)).

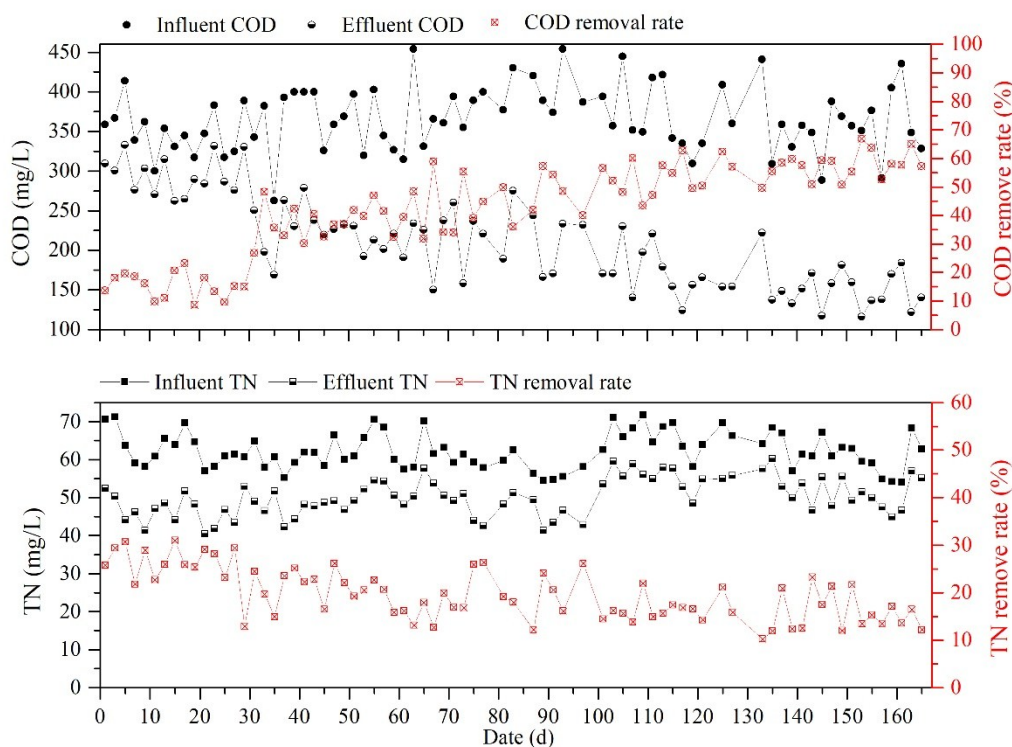

Figure S1. Performance of SBR1 under different dissolved oxygen concentrations.

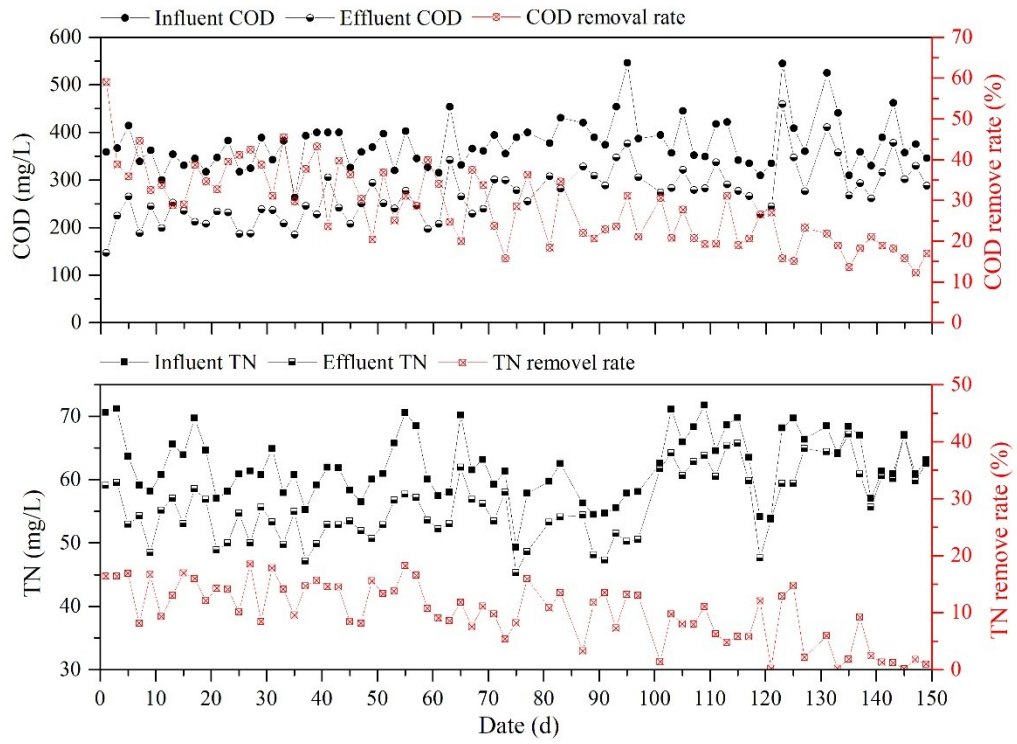

Figure S2. Performance of SBR2 under different dissolved oxygen concentrations.
